# Supplementary material for: Regulation of human and mouse telomerase genes by genomic contexts and transcription factors during embryonic stem cell differentiation
Source: PubMed Central journal article supplement (PMC5703907; doi:10.1038/s41598-017-16764-w), 2017-11-27

**Regulation of human and mouse telomerase genes by genomic contexts  
and transcription factors during embryonic stem cell differentiation**

De Cheng<sup>1,\*</sup>, Shuwen Wang<sup>1</sup>, Wenwen Jia<sup>2</sup>, Yuanjun Zhao<sup>3</sup>, Fan Zhang<sup>1</sup>, Jiahong,  
Kang<sup>2</sup>, and Jiyue Zhu<sup>1,\*</sup>

## Supplementary Information

Table S1. Southern blot probes

| <b>Probes</b>          | <b>Plasmids</b> | <b>Restriction fragments</b> | <b>Fragment size</b> |
|------------------------|-----------------|------------------------------|----------------------|
| <b>Fluc</b>            | pYF10           | Sph I-Xba I                  | 989 bp               |
| <b>Rluc</b>            | pYF2-hRluc      | Nhe I-Xba I                  | 945 bp               |
| <b>Lox511 junction</b> | pLentiPreT2     | Hind III-Sac II              | 1199 bp              |
| <b>LoxP junction</b>   | pLentiPreT2     | Hind III-PfIM I              | 953 bp               |

Table S2. Antibodies

| <b>Antibodies</b> | <b>Sources</b>    | <b>Cat. #</b> | <b>Manufactures</b>      | <b>Applications</b> |
|-------------------|-------------------|---------------|--------------------------|---------------------|
| anti-c-Myc        | Rabbit polyclonal | sc-764X       | Santa Cruz Biotechnology | ChIP                |
| anti-Max          | Rabbit polyclonal | sc-197        | Santa Cruz Biotechnology | ChIP                |
| anti-USF1         | Rabbit polyclonal | sc-229X       | Santa Cruz Biotechnology | ChIP                |
| anti-Sp1          | Rabbit polyclonal | 07-645        | EMD Millipore            | ChIP                |
| anti-E2F1         | Rabbit polyclonal | sc-193        | Santa Cruz Biotechnology | ChIP                |
| anti-E2F3         | Rabbit polyclonal | sc-878        | Santa Cruz Biotechnology | ChIP                |
| anti-H4Ac         | Rabbit polyclonal | 06-866        | EMD Millipore            | ChIP                |
| anti-H3K4me3      | Rabbit polyclonal | 07-473        | EMD Millipore            | ChIP                |
| anti-H3K9me3      | Rabbit polyclonal | ab8898        | Abcam                    | ChIP                |
| anti-H3K27me3     | Rabbit polyclonal | 07-449        | EMD Millipore            | ChIP                |
| Normal rabbit IgG | Rabbit            | sc-2027       | Santa Cruz Biotechnology | ChIP                |
| Anti-Vimentin     | Mouse monoclonal  | MA5-11883     | Thermo Fisher Scientific | IF                  |

**Fig 1B Lox511**

**Scanner Typhoon 9400**

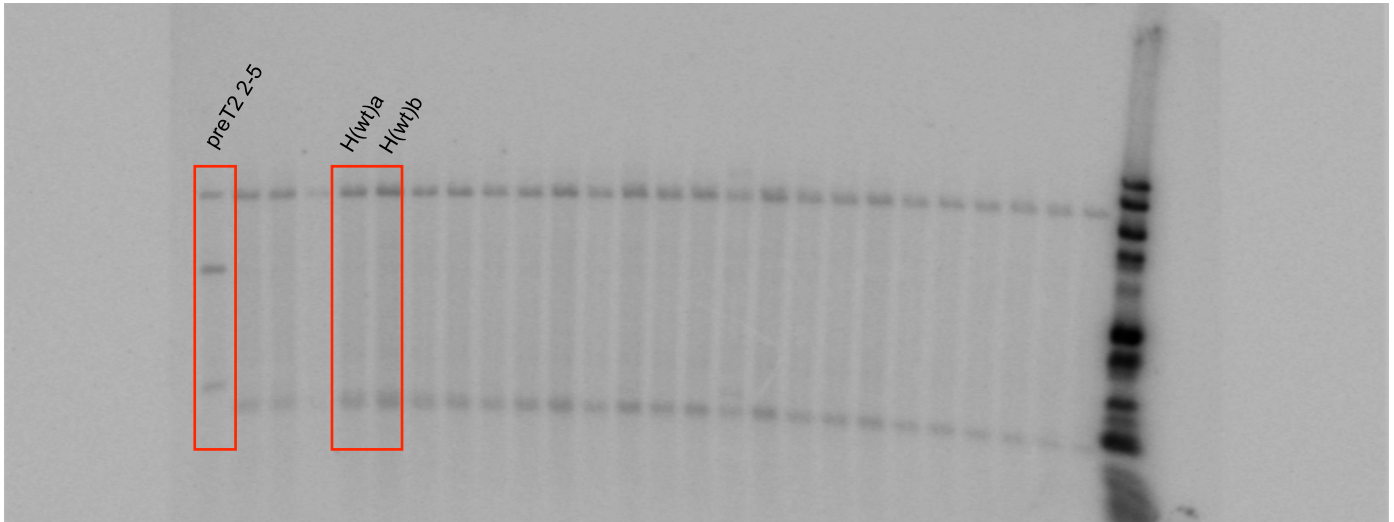

**Fig 1B Fluc&Rluc**

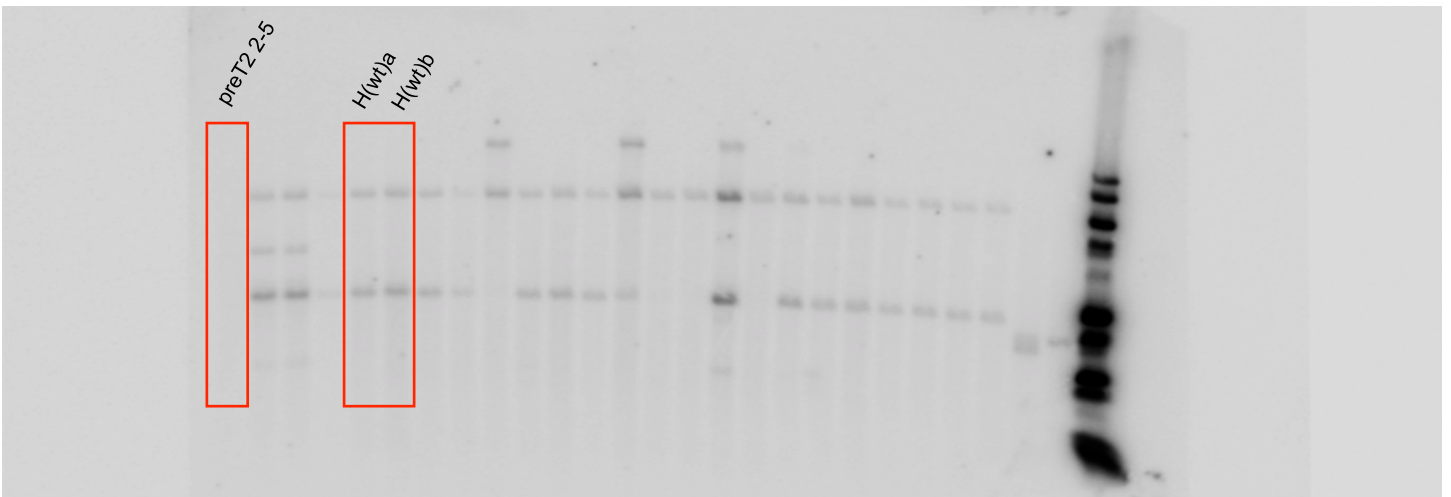

**Fig 1B LoxP Probe**

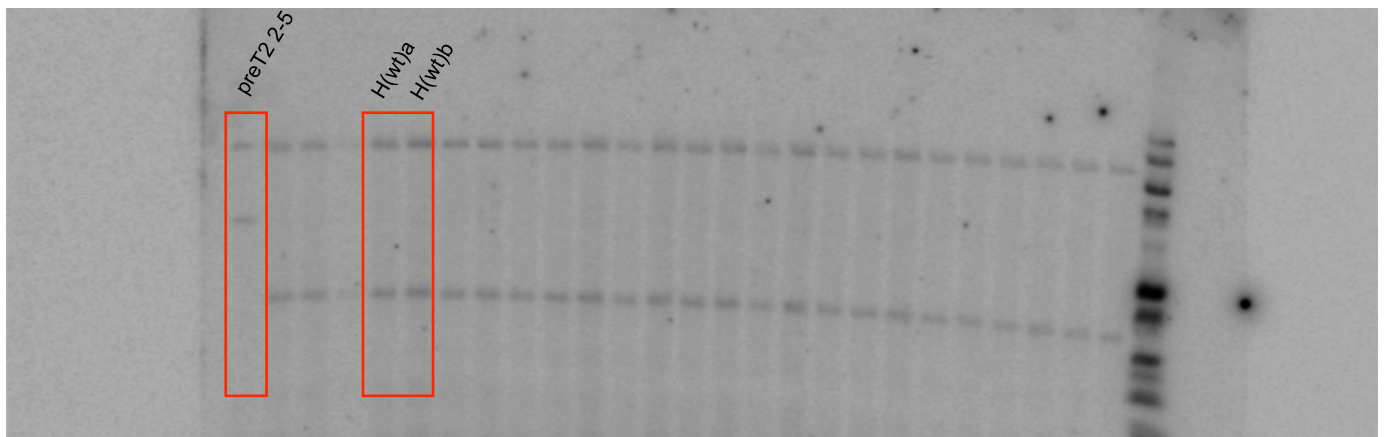

Supplement: 41598_2017_16764_MOESM1_ESM.pdf [file 41598_2017_16764_MOESM1_ESM.pdf]
